# Supplementary material for: Dirac semimetallic Janus Ni-trihalide monolayer with strain-tunable magnetic anisotropy and electronic properties
Source: Royal Society of Chemistry journal article supplement (doi:10.1039/d3cp04261h), 2023-01-01
Supplement: d3cp04261h1.pdf [file d3cp04261h1.pdf]

*Electronic Supplementary Information for*

**Dirac semimetallic Janus Ni-trihalide monolayer with strain-tunable  
magnetic anisotropy and electronic properties**

Bo Chen, Xiaocha Wang<sup>1\*</sup>, Wenbo Mi<sup>2\*</sup>,

*<sup>1</sup>Tianjin Key Laboratory of Film Electronic & Communicate Devices, School of Electrical and  
Electronic Engineering, Tianjin University of Technology, Tianjin 300384, China*

*<sup>2</sup>Department of Applied Physics, School of Science, Tianjin University, Tianjin 300354, China*

---

\* Author to whom all correspondence should be addressed.

E-mail: [wangxc@email.tjut.edu.cn](mailto:wangxc@email.tjut.edu.cn) and [miwenbo@tju.edu.cn](mailto:miwenbo@tju.edu.cn)

## A. Bader analysis

Bader charge analysis is calculated to quantify the charge transfer in  $\text{Ni}_2X_3Y_3$  ( $X, Y = \text{I, Br, Cl}$ ;  $X \neq Y$ ) monolayers, as shown in Table S1.

**Table S1** The charge transfer of each atom of  $\text{Ni}_2X_3Y_3$  ( $X, Y = \text{I, Br, Cl}$ ;  $X \neq Y$ ) monolayers.

|                                     | $\Delta q_{\text{Ni1}}(\text{e})$ | $\Delta q_{\text{Ni2}}(\text{e})$ | $\Delta q_{X1}(\text{e})$ | $\Delta q_{X2}(\text{e})$ | $\Delta q_{X3}(\text{e})$ | $\Delta q_{Y1}(\text{e})$ | $\Delta q_{Y2}(\text{e})$ | $\Delta q_{Y3}(\text{e})$ |
|-------------------------------------|-----------------------------------|-----------------------------------|---------------------------|---------------------------|---------------------------|---------------------------|---------------------------|---------------------------|
| $\text{Ni}_2\text{Cl}_3\text{Br}_3$ | 0.1203                            | 0.1053                            | 0.075                     | 0.0864                    | 0.0697                    | -0.0796                   | -0.1936                   | -0.2437                   |
| $\text{Ni}_2\text{Cl}_3\text{I}_3$  | 0.2804                            | 0.2516                            | 0.1443                    | 0.1719                    | 0.1405                    | -0.2185                   | -0.3888                   | -0.3816                   |
| $\text{Ni}_2\text{Br}_3\text{I}_3$  | 0.3844                            | 0.3639                            | 0.0292                    | 0.0523                    | 0.0294                    | -0.2022                   | -0.335                    | -0.3222                   |

## B. Band structure of $\text{Ni}_2\text{X}_3\text{Y}_3$ after applying SOC

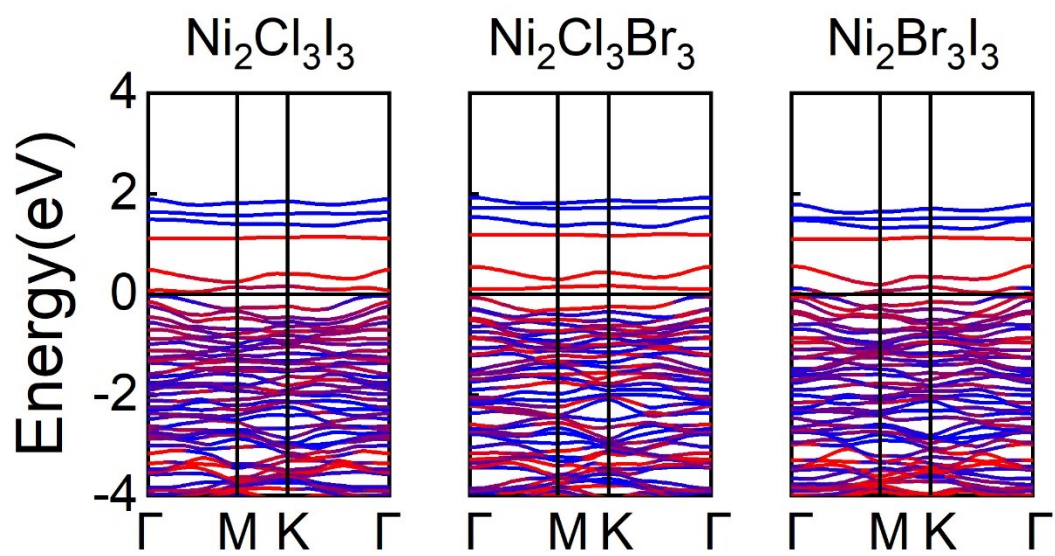

**Fig. S1.** The band structure of  $\text{Ni}_2\text{X}_3\text{Y}_3$  using the PBE+ $U$ +SOC.

### C. Density of states of $\text{Ni}_2\text{Cl}_3\text{I}_3$ and $\text{Ni}_2\text{Br}_3\text{I}_3$ after applying in-plane biaxial strain

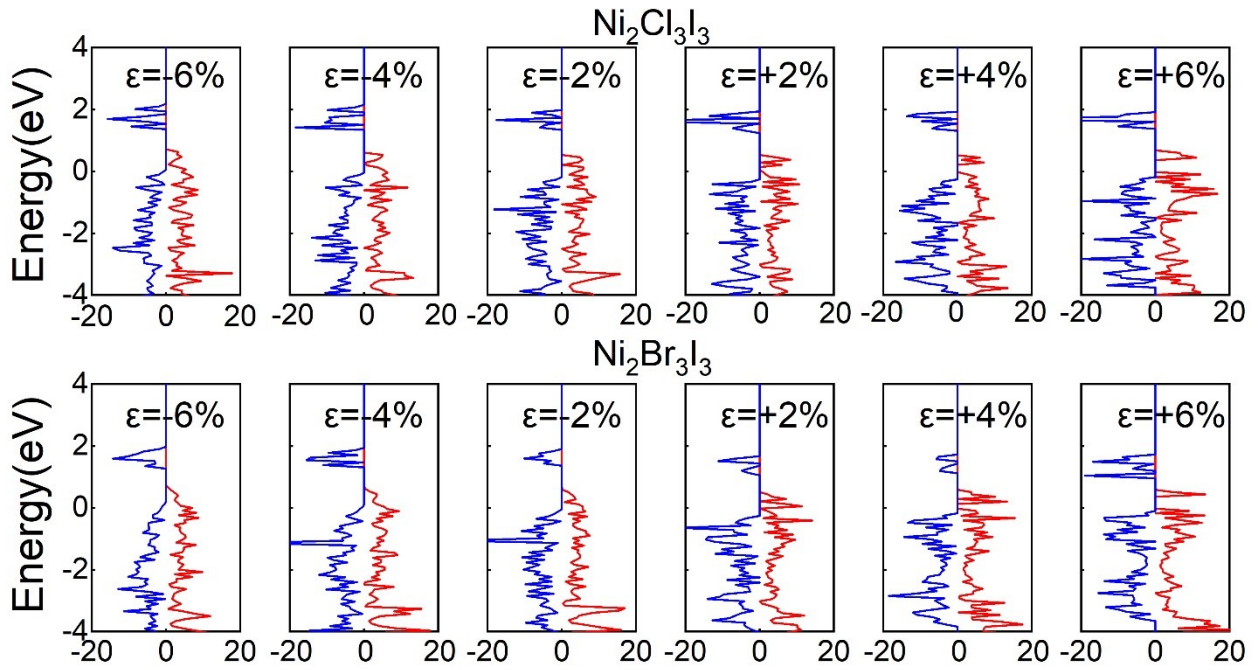

**Fig. S2.** The density of states of  $\text{Ni}_2\text{Br}_3\text{I}_3$  and  $\text{Ni}_2\text{Br}_3\text{I}_3$  after applying -6%, -4%, -2%, +2%, +4%, +6% in-plane biaxial strain.

**D. Charge density difference and the planar average of electrostatic potential**  
**after applying in-plane biaxial strain**

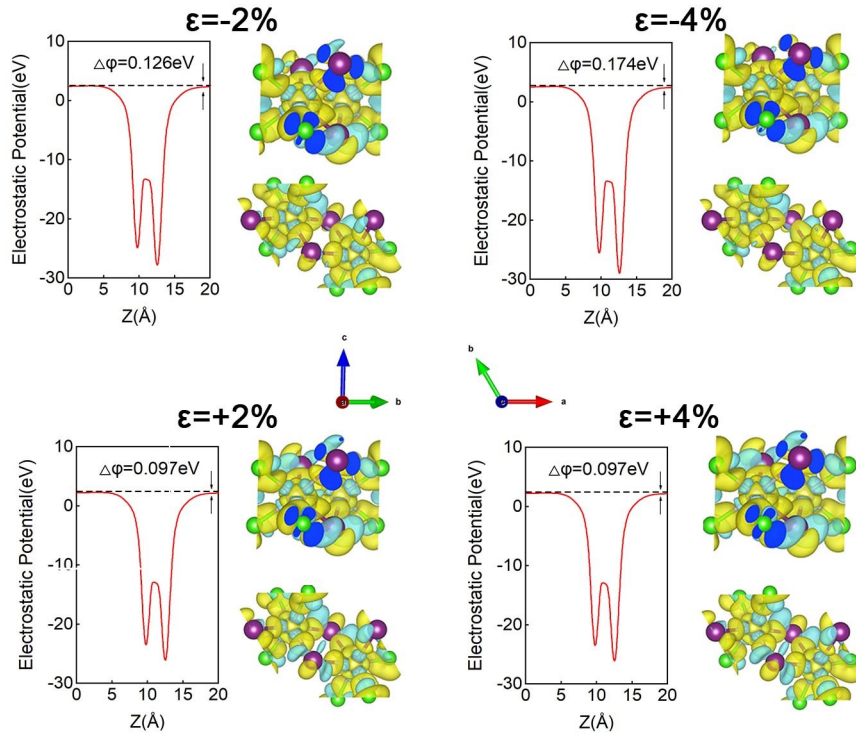

**Fig. S3.** Charge density difference of  $\text{Ni}_2\text{Cl}_3\text{I}_3$  after applying  $-4\%$ ,  $-2\%$ ,  $+2\%$ ,  $+4\%$ , in-plane biaxial strain, where yellow and blue regions represent the charge gain and loss. The planar average of electrostatic potential of  $\text{Ni}_2\text{Cl}_3\text{I}_3$  after applying  $-4\%$ ,  $-2\%$ ,  $+2\%$ ,  $+4\%$ , in-plane biaxial strain.

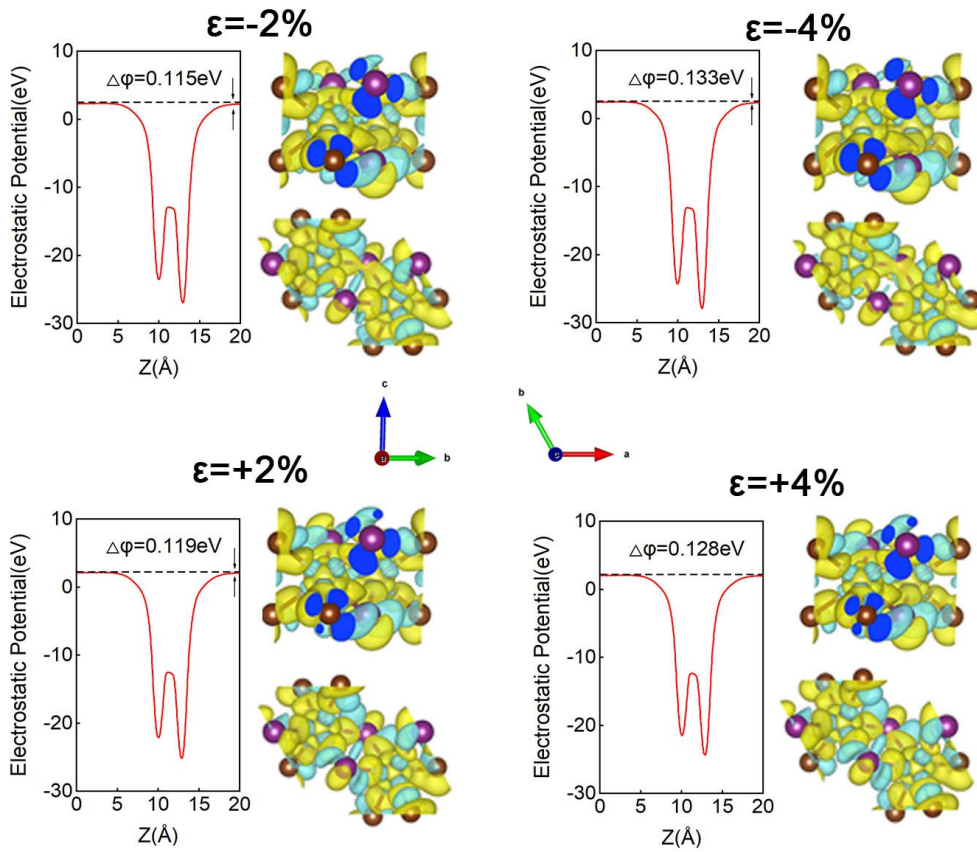

**Fig. S4.** Charge density difference after applying -4%, -2%, +2%, +4%, in-plane biaxial strain of  $\text{Ni}_2\text{Br}_3\text{I}_3$ , where yellow and blue regions represent the charge gain and loss. The planar average of electrostatic potential of  $\text{Ni}_2\text{Br}_3\text{I}_3$  after applying -4%, -2%, +2%, +4%, in-plane biaxial strain.
